# Supplementary material for: Organoplatinum Chemistry Related to Alkane Oxidation: The Effect of a Nitro Substituent in Ligands Having an Appended Phenol Group
Source: MDPI journal article supplement (doi:10.3390/inorganics12010032), 2024-01-16
Supplement: s1 [file s1]

# Organoplatinum chemistry related to alkane oxidation: The effect of a nitro substituent in ligands having an appended phenol group

Anwar Abo-Amer,<sup>1,2</sup> Mohamed E. Moustafa,<sup>1</sup> Paul D. Boyle<sup>1</sup> and Richard J. Puddephatt<sup>1\*</sup>

<sup>1</sup> Department of Chemistry, University of Western Ontario, London, Canada N6A 5B7

<sup>2</sup> Department of Chemistry, Al al-Bayt University, Jordan

\* Correspondence: [pudd@uwo.ca](mailto:pudd@uwo.ca)

## Supporting Material

**Table S1. Summary of Crystal Data for complex 1**

|                                                    |                                                     |
|----------------------------------------------------|-----------------------------------------------------|
| Formula                                            | C <sub>15</sub> H <sub>19</sub> IN <sub>2</sub> OPt |
| Formula Weight (g/mol)                             | 565.31                                              |
| Crystal Dimensions (mm )                           | 0.110 × 0.085 × 0.020                               |
| Crystal Color and Habit                            | colourless rectangular                              |
| Crystal System                                     | orthorhombic                                        |
| Space Group                                        | P b c a                                             |
| Temperature, K                                     | 110                                                 |
| a, Å                                               | 7.856(5)                                            |
| b, Å                                               | 16.549(12)                                          |
| c, Å                                               | 24.955(16)                                          |
| α, °                                               | 90                                                  |
| β, °                                               | 90                                                  |
| γ, °                                               | 90                                                  |
| V, Å <sup>3</sup>                                  | 3244(4)                                             |
| Number of reflections to determine final unit cell | 9976                                                |
| Min and Max 2θ for cell determination, °           | 5.18, 57.34                                         |
| Z                                                  | 8                                                   |
| F(000)                                             | 2096                                                |
| ρ (g/cm)                                           | 2.315                                               |
| λ, Å, (MoKα)                                       | 0.71073                                             |
| μ, (cm <sup>-1</sup> )                             | 10.550                                              |
| Diffractometer Type                                | Bruker Kappa Axis Apex2                             |

|                                                            |                                                                                                                             |
|------------------------------------------------------------|-----------------------------------------------------------------------------------------------------------------------------|
| Scan Type(s)                                               | phi and omega scans                                                                                                         |
| Max 2θ for data collection, °                              | 57.472                                                                                                                      |
| Measured fraction of data                                  | 0.985                                                                                                                       |
| Number of reflections measured                             | 48321                                                                                                                       |
| Unique reflections measured                                | 4136                                                                                                                        |
| R <sub>merge</sub>                                         | 0.1046                                                                                                                      |
| Number of reflections included in refinement               | 4136                                                                                                                        |
| Cut off Threshold Expression                               | I > 2sigma(I)                                                                                                               |
| Structure refined using                                    | full matrix least-squares using F <sup>2</sup>                                                                              |
| Weighting Scheme                                           | w=1/[sigma <sup>2</sup> (Fo <sup>2</sup> )+(0.0069P) <sup>2</sup> +14.7589P] where P=(Fo <sup>2</sup> +2Fc <sup>2</sup> )/3 |
| Number of parameters in least-squares                      | 185                                                                                                                         |
| R <sub>1</sub>                                             | 0.0348                                                                                                                      |
| wR <sub>2</sub>                                            | 0.0447                                                                                                                      |
| R <sub>1</sub> (all data)                                  | 0.0671                                                                                                                      |
| wR <sub>2</sub> (all data)                                 | 0.0511                                                                                                                      |
| GOF                                                        | 1.016                                                                                                                       |
| Maximum shift/error                                        | 0.002                                                                                                                       |
| Min & Max peak heights on final ΔF Map (e <sup>-</sup> /Å) | -1.269, 1.180                                                                                                               |

Where:

$$R_1 = \sum (|F_o| - |F_c|) / \sum F_o$$

$$wR_2 = [ \sum w (F_o^2 - F_c^2)^2 / \sum w F_o^4 ]^{1/2}$$

$$GOF = [ \sum w (F_o^2 - F_c^2)^2 / (\text{No. of reflns.} - \text{No. of params.}) ]^{1/2}$$

**Table S2. Summary of Crystal Data for complex 2**

|                                                    |                                                                                                                       |
|----------------------------------------------------|-----------------------------------------------------------------------------------------------------------------------|
| Formula                                            | C <sub>29.50</sub> H <sub>39.50</sub> BrCl <sub>1.50</sub> N <sub>2</sub> OPt                                         |
| Formula Weight (g/mol)                             | 766.30                                                                                                                |
| Crystal Dimensions (mm )                           | 0.212 × 0.122 × 0.034                                                                                                 |
| Crystal Color and Habit                            | yellow plate                                                                                                          |
| Crystal System                                     | monoclinic                                                                                                            |
| Space Group                                        | P 2 <sub>1</sub> /c                                                                                                   |
| Temperature, K                                     | 110                                                                                                                   |
| <i>a</i> , Å                                       | 17.567(7)                                                                                                             |
| <i>b</i> , Å                                       | 18.400(8)                                                                                                             |
| <i>c</i> , Å                                       | 19.284(8)                                                                                                             |
| $\alpha$ , °                                       | 90                                                                                                                    |
| $\beta$ , °                                        | 107.256(7)                                                                                                            |
| $\gamma$ , °                                       | 90                                                                                                                    |
| <i>V</i> , Å <sup>3</sup>                          | 5952(4)                                                                                                               |
| Number of reflections to determine final unit cell | 9915                                                                                                                  |
| Min and Max 2 $\theta$ for cell determination, °   | 5.52, 60.16                                                                                                           |
| <i>Z</i>                                           | 8                                                                                                                     |
| F(000)                                             | 3016                                                                                                                  |
| $\rho$ (g/cm)                                      | 1.710                                                                                                                 |
| $\lambda$ , Å, (MoK $\alpha$ )                     | 0.71073                                                                                                               |
| $\mu$ , (cm <sup>-1</sup> )                        | 6.216                                                                                                                 |
| Diffractometer Type                                | Bruker Kappa Axis Apex2                                                                                               |
| Scan Type(s)                                       | phi and omega scans                                                                                                   |
| Max 2 $\theta$ for data collection, °              | 64.126                                                                                                                |
| Measured fraction of data                          | 0.997                                                                                                                 |
| Number of reflections measured                     | 122016                                                                                                                |
| Unique reflections measured                        | 20198                                                                                                                 |
| R <sub>merge</sub>                                 | 0.0879                                                                                                                |
| Number of reflections included in refinement       | 20198                                                                                                                 |
| Cut off Threshold Expression                       | I > 2sigma(I)                                                                                                         |
| Structure refined using                            | full matrix least-squares using F <sup>2</sup>                                                                        |
| Weighting Scheme                                   | w=1/[sigma <sup>2</sup> (Fo <sup>2</sup> )+(0.0241P) <sup>2</sup> ] where<br>P=(Fo <sup>2</sup> +2Fc <sup>2</sup> )/3 |
| Number of parameters in least-squares              | 721                                                                                                                   |

|                                                            |               |
|------------------------------------------------------------|---------------|
| R <sub>1</sub>                                             | 0.0405        |
| wR <sub>2</sub>                                            | 0.0626        |
| R <sub>1</sub> (all data)                                  | 0.0900        |
| wR <sub>2</sub> (all data)                                 | 0.0742        |
| GOF                                                        | 0.992         |
| Maximum shift/error                                        | 0.001         |
| Min & Max peak heights on final ΔF Map (e <sup>-</sup> /Å) | -1.395, 1.392 |

Where:

$$R_1 = \sum (|F_o| - |F_c|) / \sum F_o$$

$$wR_2 = [ \sum (w(F_o^2 - F_c^2)^2) / \sum (w F_o^4) ]^{1/2}$$

$$GOF = [ \sum (w(F_o^2 - F_c^2)^2) / (\text{No. of reflns.} - \text{No. of params.}) ]^{1/2}$$

**Table S3. Summary of Crystal Data for Complex 5**

|                                                    |                                                                                                                            |
|----------------------------------------------------|----------------------------------------------------------------------------------------------------------------------------|
| Formula                                            | C <sub>23</sub> H <sub>27</sub> N <sub>3</sub> O <sub>5</sub> Pt                                                           |
| Formula Weight (g/mol)                             | 620.56                                                                                                                     |
| Crystal Dimensions (mm )                           | 0.129 × 0.077 × 0.071                                                                                                      |
| Crystal Color and Habit                            | yellow prism                                                                                                               |
| Crystal System                                     | monoclinic                                                                                                                 |
| Space Group                                        | P 2 <sub>1</sub> /n                                                                                                        |
| Temperature, K                                     | 110                                                                                                                        |
| <i>a</i> , Å                                       | 12.569(5)                                                                                                                  |
| <i>b</i> , Å                                       | 13.718(6)                                                                                                                  |
| <i>c</i> , Å                                       | 13.791(6)                                                                                                                  |
| α, °                                               | 90                                                                                                                         |
| β, °                                               | 110.79(2)                                                                                                                  |
| γ, °                                               | 90                                                                                                                         |
| <i>V</i> , Å <sup>3</sup>                          | 2223.1(16)                                                                                                                 |
| Number of reflections to determine final unit cell | 9889                                                                                                                       |
| Min and Max 2θ for cell determination, °           | 5.46, 68.56                                                                                                                |
| <i>Z</i>                                           | 4                                                                                                                          |
| F(000)                                             | 1216                                                                                                                       |
| ρ (g/cm)                                           | 1.854                                                                                                                      |
| λ, Å, (MoKα)                                       | 0.71073                                                                                                                    |
| μ, (cm <sup>-1</sup> )                             | 6.352                                                                                                                      |
| Diffractometer Type                                | Bruker Kappa Axis Apex2                                                                                                    |
| Scan Type(s)                                       | phi and omega scans                                                                                                        |
| Max 2θ for data collection, °                      | 78.906                                                                                                                     |
| Measured fraction of data                          | 0.999                                                                                                                      |
| Number of reflections measured                     | 241379                                                                                                                     |
| Unique reflections measured                        | 13302                                                                                                                      |
| R <sub>merge</sub>                                 | 0.0849                                                                                                                     |
| Number of reflections included in refinement       | 13302                                                                                                                      |
| Cut off Threshold Expression                       | I > 2sigma(I)                                                                                                              |
| Structure refined using                            | full matrix least-squares using F <sup>2</sup>                                                                             |
| Weighting Scheme                                   | w=1/[sigma <sup>2</sup> (Fo <sup>2</sup> )+(0.0185P) <sup>2</sup> +1.1302P] where P=(Fo <sup>2</sup> +2Fc <sup>2</sup> )/3 |
| Number of parameters in least-squares              | 304                                                                                                                        |

|                                                            |               |
|------------------------------------------------------------|---------------|
| R <sub>1</sub>                                             | 0.0246        |
| wR <sub>2</sub>                                            | 0.0473        |
| R <sub>1</sub> (all data)                                  | 0.0396        |
| wR <sub>2</sub> (all data)                                 | 0.0513        |
| GOF                                                        | 1.025         |
| Maximum shift/error                                        | 0.006         |
| Min & Max peak heights on final ΔF Map (e <sup>-</sup> /Å) | -1.240, 1.062 |

Where:

$$R_1 = \sum (|F_o| - |F_c|) / \sum F_o$$

$$wR_2 = [ \sum (w(F_o^2 - F_c^2)^2) / \sum (w F_o^4) ]^{1/2}$$

$$GOF = [ \sum (w(F_o^2 - F_c^2)^2) / (\text{No. of reflns.} - \text{No. of params.}) ]$$

**Table S4. Selected Bond Lengths and Angles for Complex 1**

|        |            |           |            |
|--------|------------|-----------|------------|
| Pt1-C1 | 2.047(5)   | C1-Pt1-C2 | 87.2(2)    |
| Pt1-C2 | 2.050(6)   | C1-Pt1-C3 | 86.2(2)    |
| Pt1-C3 | 2.060(5)   | C2-Pt1-C3 | 88.4(2)    |
| Pt1-N2 | 2.161(5)   | C1-Pt1-N2 | 98.7(2)    |
| Pt1-N1 | 2.164(5)   | C2-Pt1-N2 | 173.5(2)   |
| Pt1-I1 | 2.7803(14) | C3-Pt1-N2 | 89.5(2)    |
| N1-C4  | 1.339(7)   | C1-Pt1-N1 | 174.4(2)   |
|        |            | C2-Pt1-N1 | 97.2(2)    |
|        |            | C3-Pt1-N1 | 90.5(2)    |
|        |            | N2-Pt1-N1 | 76.69(18)  |
|        |            | C1-Pt1-I1 | 92.46(17)  |
|        |            | C2-Pt1-I1 | 90.20(17)  |
|        |            | C3-Pt1-I1 | 178.06(17) |
|        |            | N2-Pt1-I1 | 92.10(12)  |
|        |            | N1-Pt1-I1 | 91.01(12)  |

**Table S5. Selected Bond Lengths and Angles for complex 2**

|          |            |              |            |
|----------|------------|--------------|------------|
| Pt1-C2A  | 2.045(4)   | C2A-Pt1-C1A  | 86.13(15)  |
| Pt1-C1A  | 2.049(4)   | C2A-Pt1-C3A  | 88.19(16)  |
| Pt1-C3A  | 2.075(4)   | C1A-Pt1-C3A  | 84.75(15)  |
| Pt1-N1A  | 2.156(3)   | C2A-Pt1-N1A  | 96.88(14)  |
| Pt1-N2A  | 2.186(3)   | C1A-Pt1-N1A  | 176.77(13) |
| Pt1-Br1A | 2.6076(11) | C3A-Pt1-N1A  | 96.51(13)  |
|          |            | C2A-Pt1-N2A  | 172.31(14) |
|          |            | C1A-Pt1-N2A  | 101.11(13) |
|          |            | C3A-Pt1-N2A  | 89.89(13)  |
|          |            | N1A-Pt1-N2A  | 75.94(11)  |
|          |            | C2A-Pt1-Br1A | 93.10(12)  |
|          |            | C1A-Pt1-Br1A | 92.62(11)  |
|          |            | C3A-Pt1-Br1A | 176.98(10) |
|          |            | N1A-Pt1-Br1A | 86.05(8)   |
|          |            | N2A-Pt1-Br1A | 89.19(8)   |



**Table S6. Selected Bond Lengths and Angles for Complex 5**

|        |            |           |           |
|--------|------------|-----------|-----------|
| Pt1-O2 | 1.9936(15) | O2-Pt1-C6 | 90.27(6)  |
| Pt1-C6 | 1.9968(18) | O2-Pt1-O1 | 176.25(5) |
| Pt1-O1 | 2.0447(15) | C6-Pt1-O1 | 89.95(6)  |
| Pt1-C1 | 2.0500(18) | O2-Pt1-C1 | 89.91(7)  |
| Pt1-N1 | 2.1567(16) | C6-Pt1-C1 | 81.24(7)  |
| Pt1-N2 | 2.1725(16) | O1-Pt1-C1 | 93.82(7)  |
|        |            | O2-Pt1-N1 | 90.58(6)  |
|        |            | C6-Pt1-N1 | 177.58(6) |
|        |            | O1-Pt1-N1 | 89.05(6)  |
|        |            | C1-Pt1-N1 | 101.02(7) |
|        |            | O2-Pt1-N2 | 93.88(6)  |
|        |            | C6-Pt1-N2 | 99.15(7)  |
|        |            | O1-Pt1-N2 | 82.39(6)  |
|        |            | C1-Pt1-N2 | 176.19(6) |

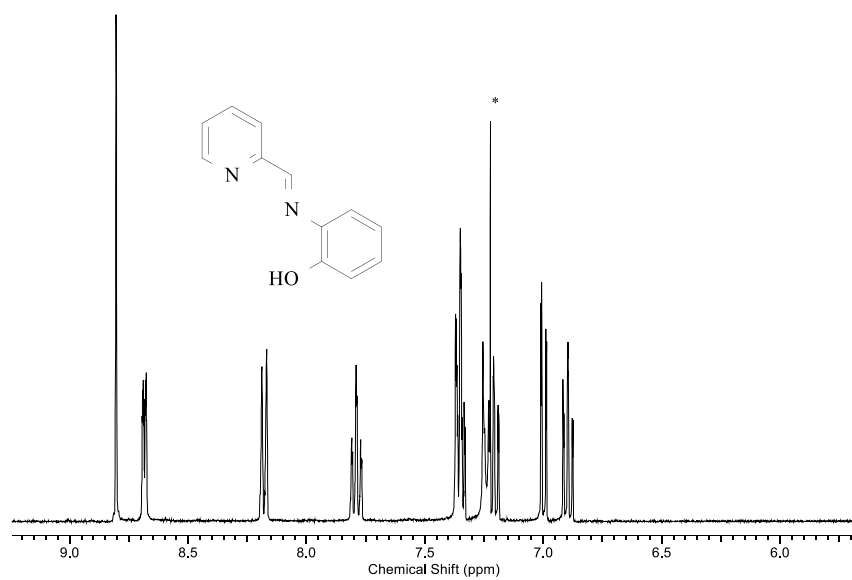

Figure S1.  $^1\text{H}$  NMR spectrum of ligand **L2**.

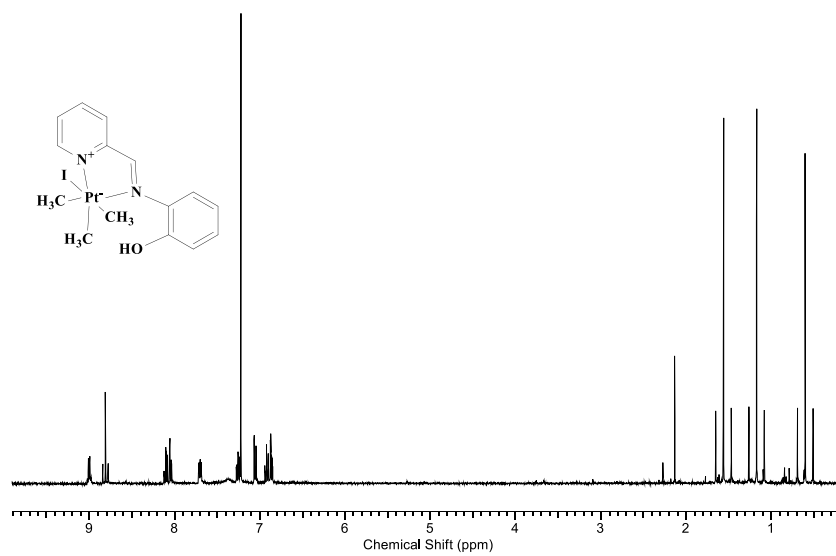

Figure S2.  $^1\text{H}$  NMR spectrum of complex **1**.

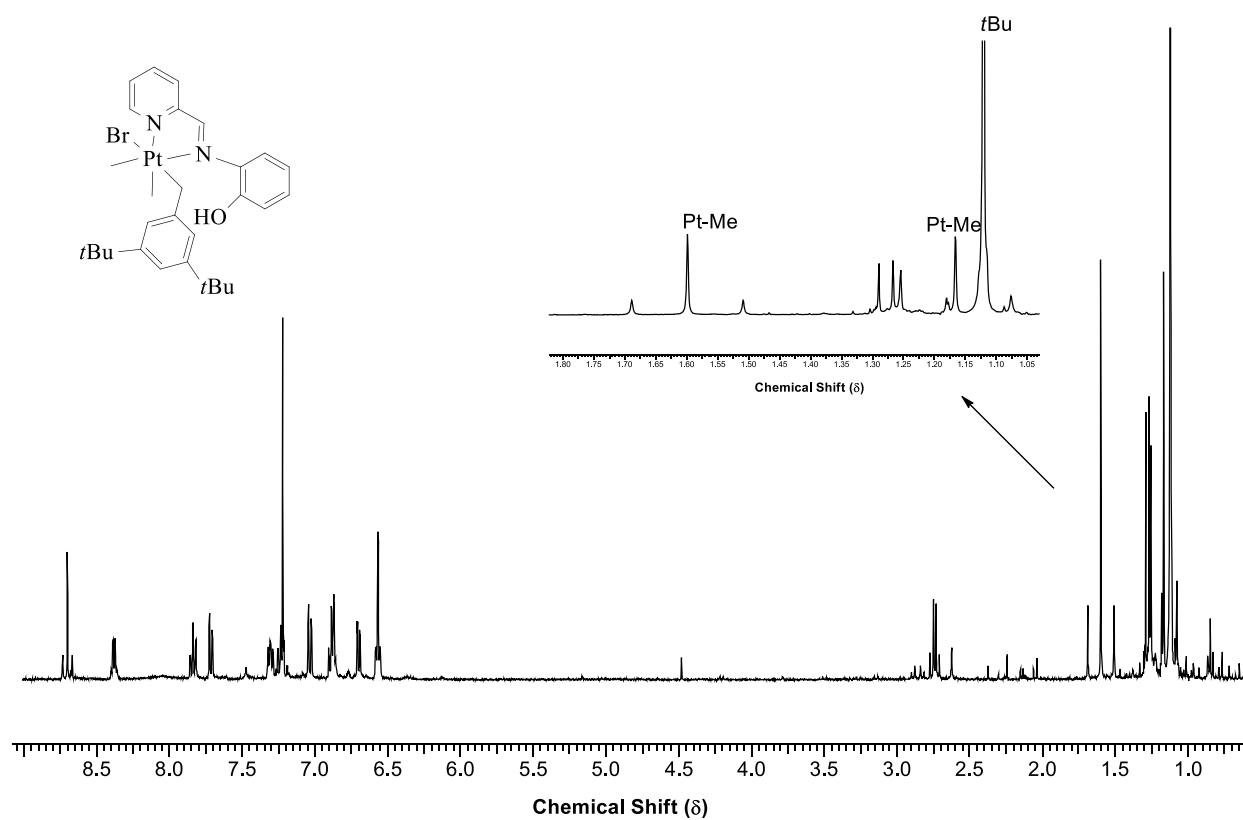

Figure S3.  $^1\text{H}$  NMR spectrum of complex **2**.

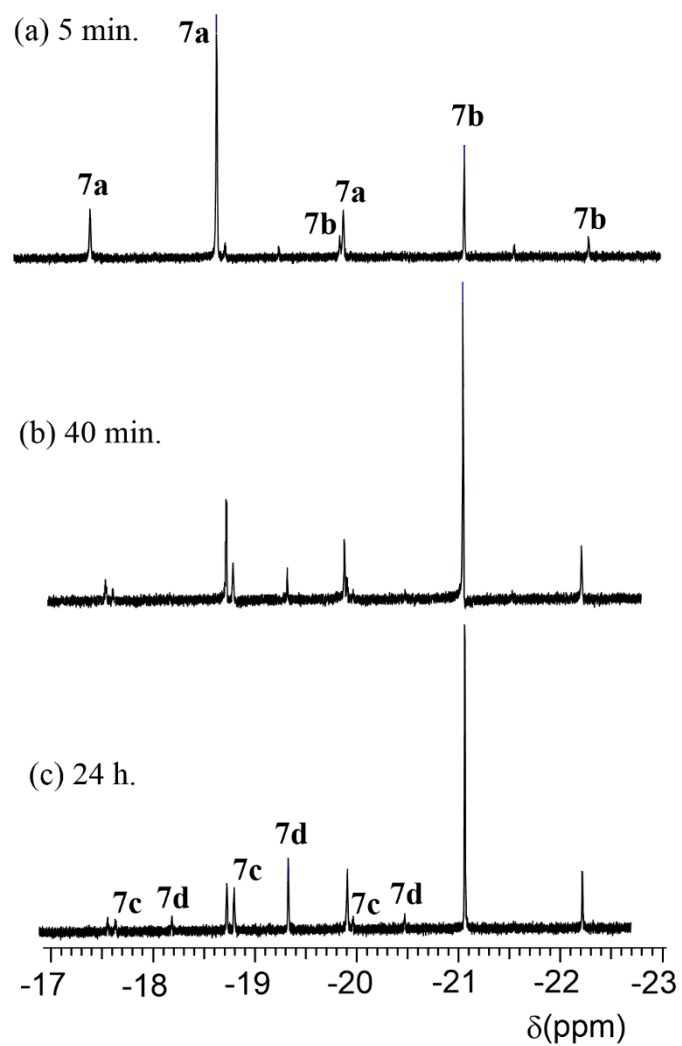

Figure S4.  $^1\text{H}$  NMR spectra in the PtH region during formation and isomerization of complexes **7a-7d**.
